# Supplementary material
Source: PubMed Central journal article supplement (PMC7854278)
Supplement: mmc1.pdf [file mmc1.pdf]

## **Supplemental Information**

### **Regional Hyperthermia Enhances Mesenchymal Stem**

### **Cell Recruitment to Tumor Stroma: Implications**

### **for Mesenchymal Stem Cell-Based Tumor Therapy**

**Mariella Tutter, Christina Schug, Kathrin A. Schmohl, Sarah Urnauer, Carolin Kitzberger, Nathalie Schwenk, Matteo Petrini, Christian Zach, Sibylle Ziegler, Peter Bartenstein, Wolfgang A. Weber, Gabriele Multhoff, Ernst Wagner, Lars H. Lindner, Peter J. Nelson, and Christine Spitzweg**

## Supplemental Figures

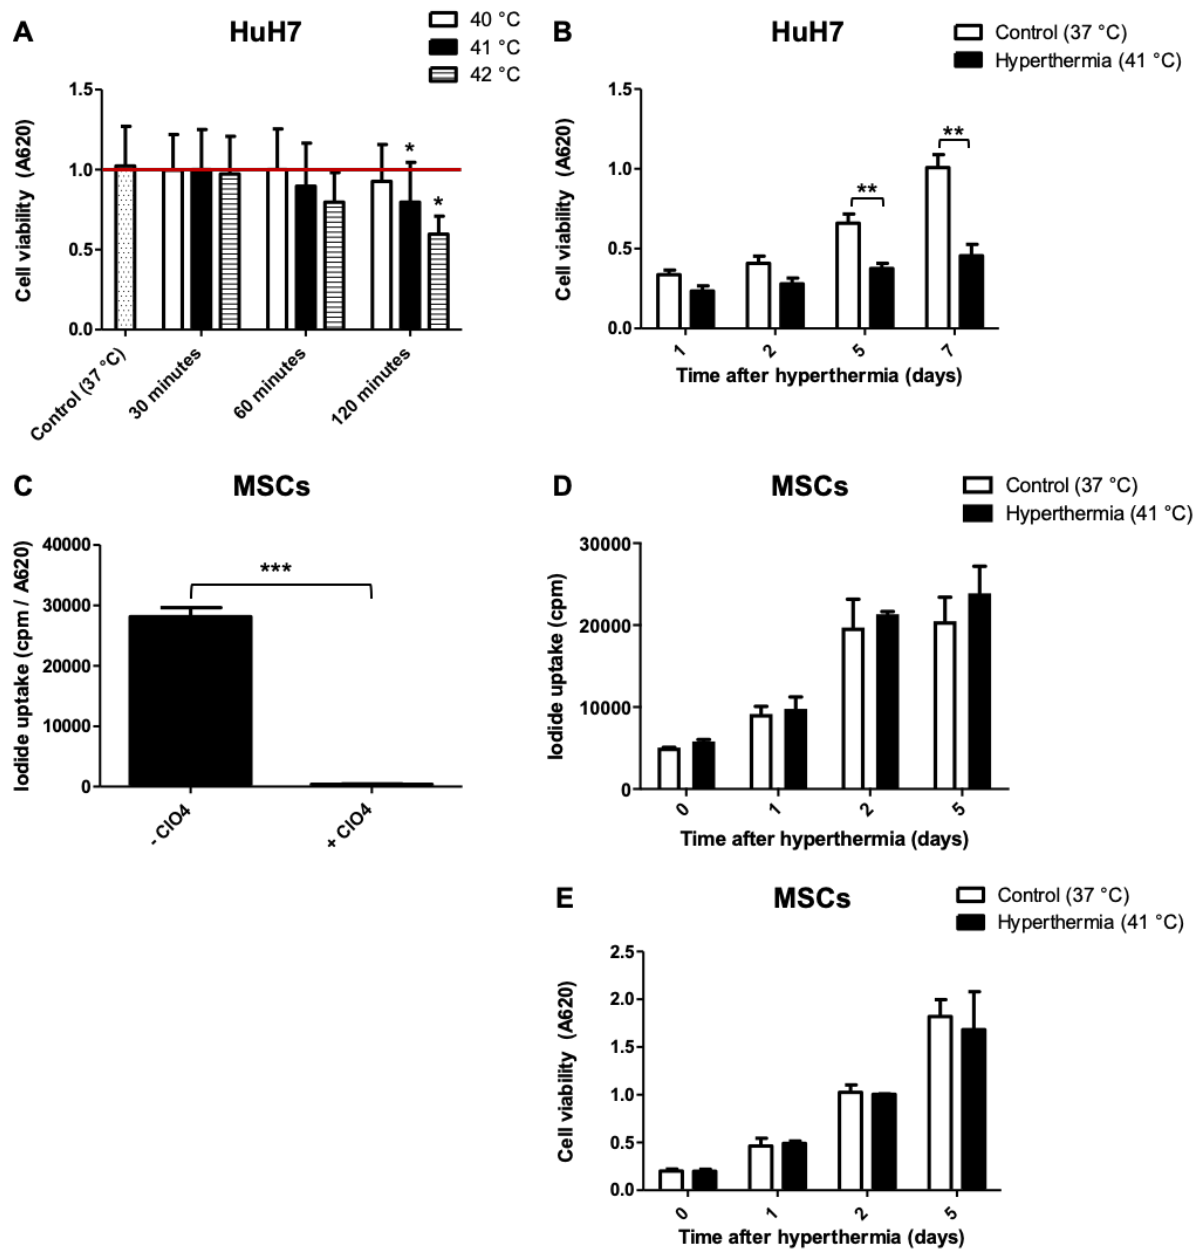

**Figure S1: Hyperthermia effects *in vitro***

The effect of hyperthermia on HuH7 cells *in vitro* was analyzed by MTT assay 24 hours after heat treatment in a water bath for 30 to 120 minutes, at temperatures ranging from 40 to 42 °C. The red line represents the cell viability of the 37 °C controls (A). Following hyperthermia at 41 °C for 60 minutes, long-term cell viability was analyzed after 1 - 7 days (B). *In vitro* iodine uptake of CMV-NIS-MSCs was determined by a <sup>125</sup>I uptake assay. Perchlorate was added to demonstrate NIS dependency of the reaction (C; *n* = 6). In addition, the effects of hyperthermia on the iodine accumulation by CMV-NIS-MSCs (D) and their viability (E) was evaluated 0 - 5 days after one hour at 41 °C. All experiments were conducted at least in triplicate and are expressed as mean ± SEM (two-tailed Student's *t* test for comparison of heat-treated to unheated cells; \**p* < 0.05; \*\**p* < 0.01; \*\*\**p* < 0.001).

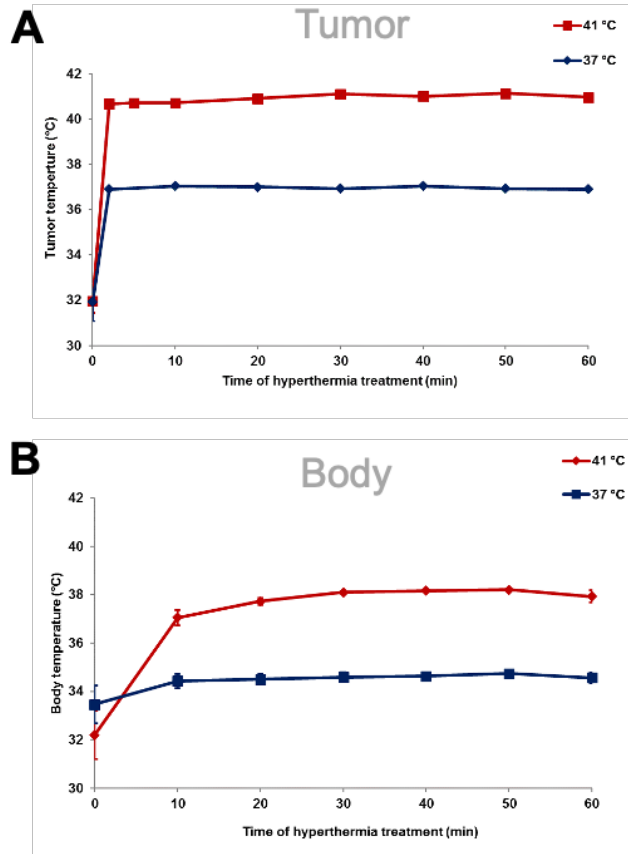

**Figure S2: Establishment of *in vivo* heat treatment**

*In vivo* heat treatment establishing experiments were conducted using intratumoral (A) and rectal temperature probes (B). Tumors were heat-treated either with 41 °C or 37 °C (control) for 1 hour using a water bath ( $n = 3$ ).
